# Supplementary material
Source: PubMed Central journal article supplement (PMC5751434)
Supplement: NIHMS926562-supplement-Supp_Files.pdf [file NIHMS926562-supplement-Supp_Files.pdf]

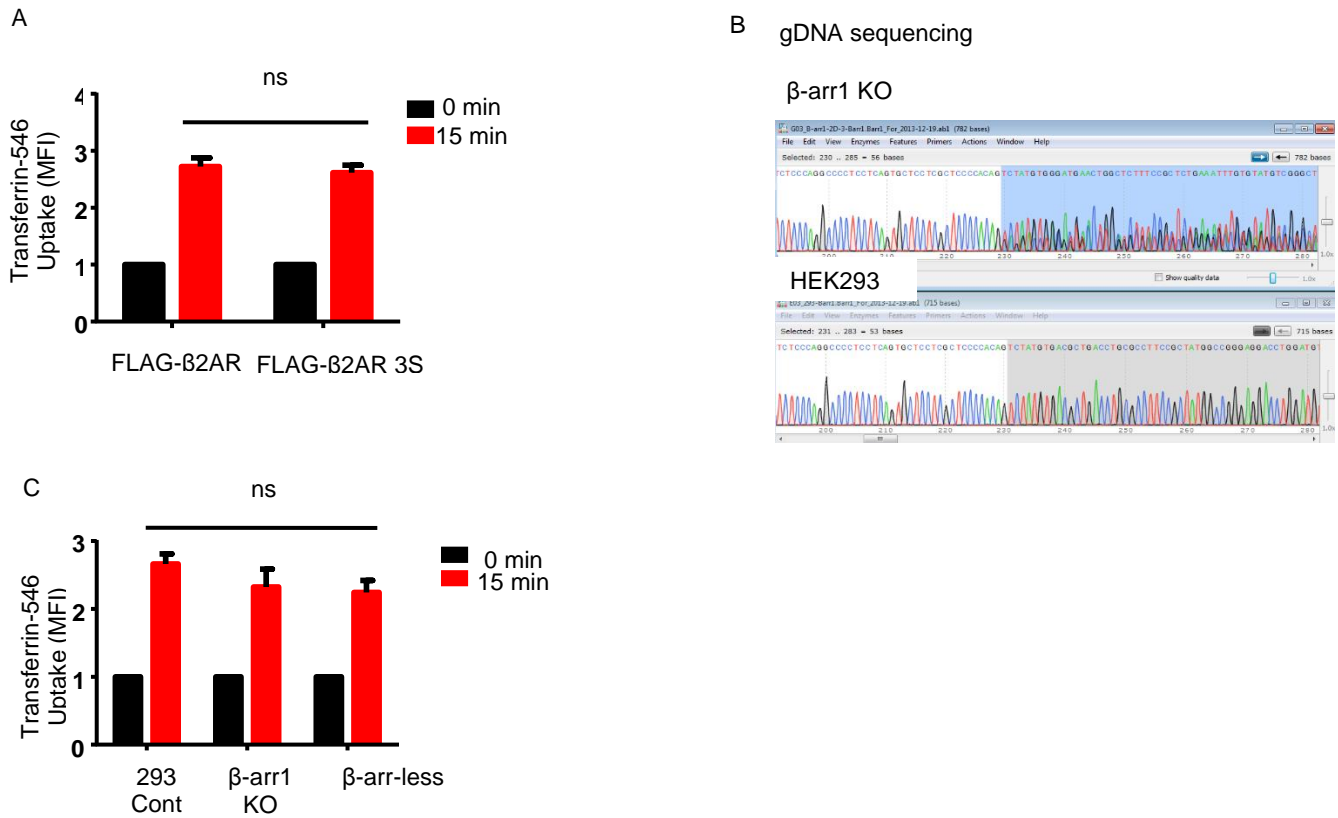

**Fig. S1 . Transferrin uptake experiments and genomic DNA sequencing of the  $\beta$ -arr1 KO cell line.** A) Quantification of median fluorescence intensity (MFI) of 15 min transferrin-546 uptake by flow cytometry in 293 FLAG- $\beta_2$ AR and 293 FLAG- $\beta_2$ AR 3S cells); mean of three independent experiments  $\pm$  SD. B) Sequence chromatogram of genomic DNA (gDNA) surrounding the  $\beta$ -arr1 TALEN cut site in the  $\beta$ -arr1 KO clone (top) and HEK293 WT control (bottom). C) Flow cytometry quantification of MFI of 15 min transferrin-546 uptake in 293 FLAG- $\beta_2$ AR,  $\beta$ -arr1 KO, and  $\beta$ -arr1-less cells); mean of three independent experiments  $\pm$  SD. Statistical significance was determined based on an ANOVA test; ns indicates not significant.

A

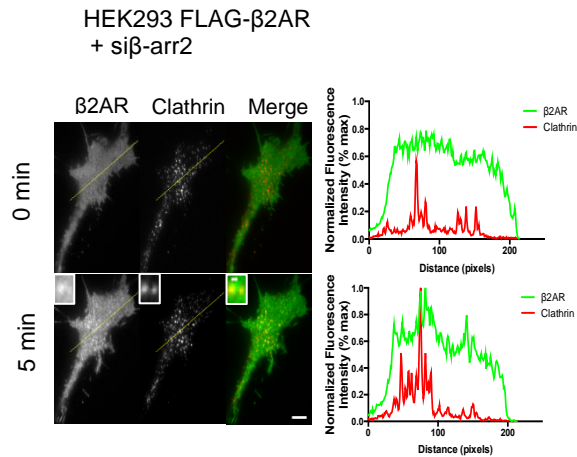

B

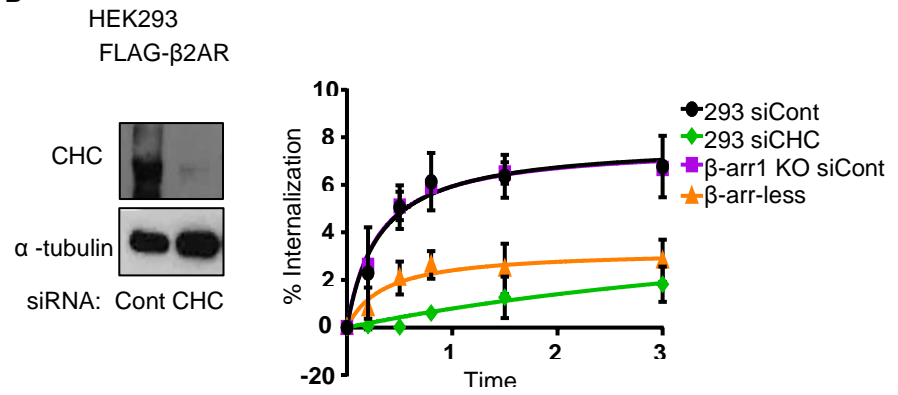

**Fig. S2. Clathrin is important for isoproterenol-mediated  $\beta_2$ AR internalization.** A) TIRF microscopy image of FLAG- $\beta_2$ AR (green) and clathrin coated pits (red) in 293 FLAG- $\beta_2$ AR cells transfected with siRNA against  $\beta$ -arr2, before and after 5 min Iso stimulation. Graphs on the right hand side depict the overlap in fluorescence intensity across the cell, as shown by the designated lines, between FLAG- $\beta_2$ AR (green) and clathrin coated pits (red) as an indication of colocalization. Representative of three independent experiments. Scale bar, 5  $\mu$ m, inset scale bar 500 nm. B) Western blot showing knockdown of clathrin heavy chain (siCHC) and  $\alpha$ -tubulin loading control (left, representative of three independent experiments) and a flow-cytometry based internalization assay comparing FLAG- $\beta_2$ AR internalization upon knockdown of CHC with  $\beta$ -arr1-less,  $\beta$ -arr1 KO and 293 siCont cells (right); mean of three independent experiments  $\pm$  SD.

A

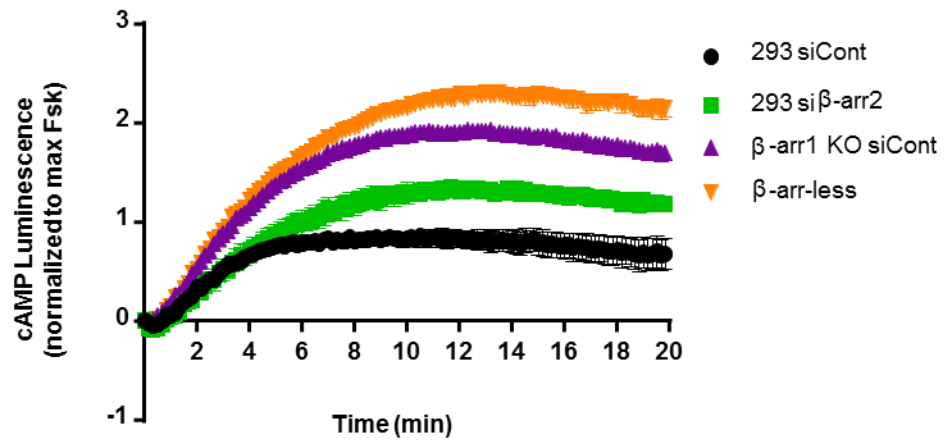

**Fig. S3. Depletion of both  $\beta$ -arr1 and  $\beta$ -arr2 increases  $\beta_2$ AR-mediated cAMP production.** Measurement of cAMP luminescence over time after Iso stimulation (10  $\mu$ M) in 293 and  $\beta$ -arr1 KO FLAG- $\beta_2$ AR cells transfected with siRNA control (siCont) or si $\beta$ -arr2.  $\beta$ -arr-less cells are  $\beta$ -arr1 KO cells transfected with siRNA to  $\beta$ -arr2. Representative of three independent experiments.

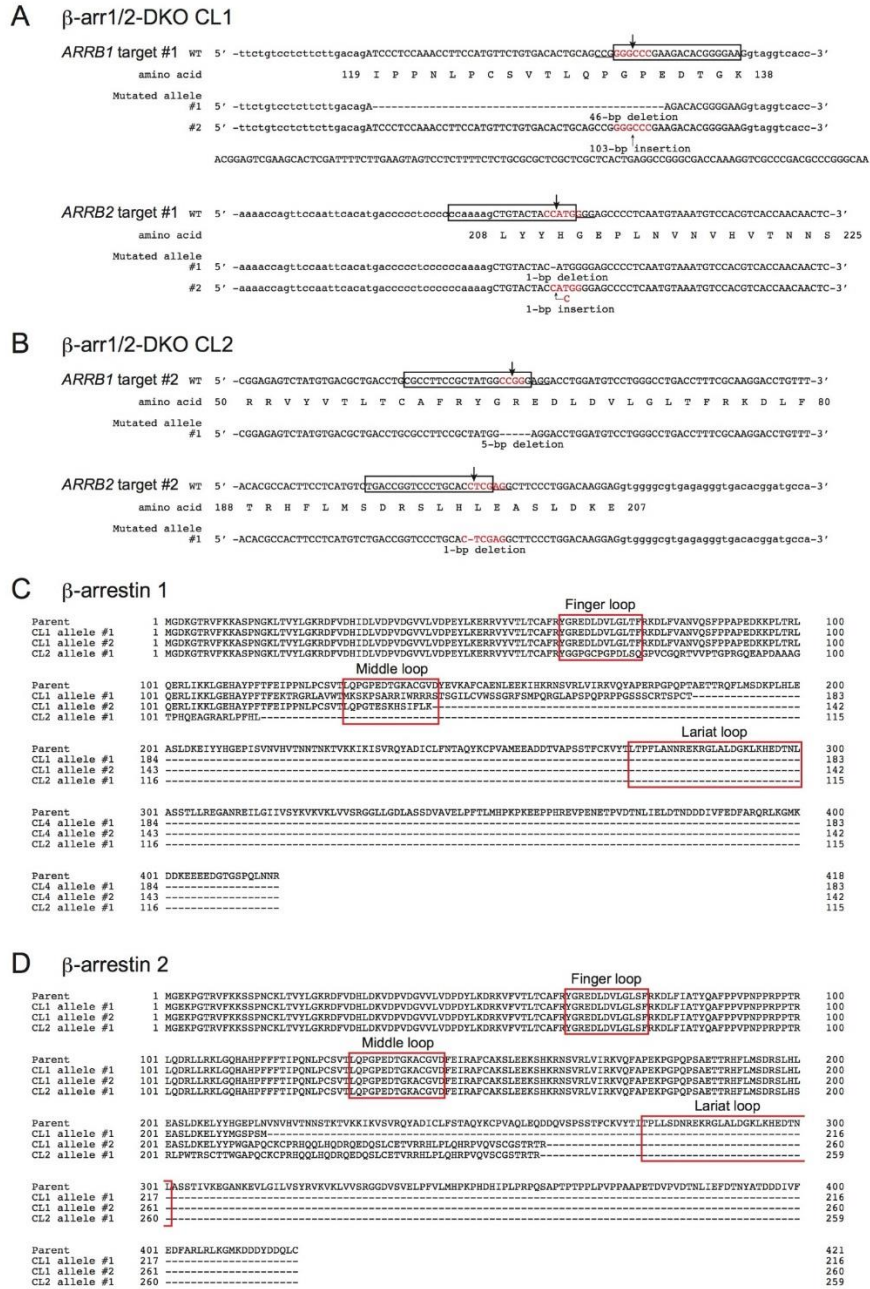

**Fig. S4. Sequence of  $\beta$ -arr1/2-double-mutant cells.** (A, B) Genomic sequences of the two mutant clones (A, CL1; B, CL2) near sgRNA-targeted sites. sgRNA target sequences are boxed and PAM sequences (NGG) are underlined. Arrows indicate a putative double-stranded break site. Restriction enzyme sites (Apa I (ARRB1 target #1), Nco I (ARRB2 target #2), Hap II (ARRB1 target #2) and Xho I (ARRB2 target #2)) are highlighted in red. Sequences in capital and lower letters indicate exons and introns, respectively. Note that all mutant alleles in CL1 and CL2 carried frame-shift mutations. (C, D) Alignment of deduced amino acids of the  $\beta$ -arrestin1/2-double mutant cells. Three critical loops of  $\beta$ -arrestin are boxed in red. Note that all truncated proteins encoded by the mutant alleles lack the Lariat loop.

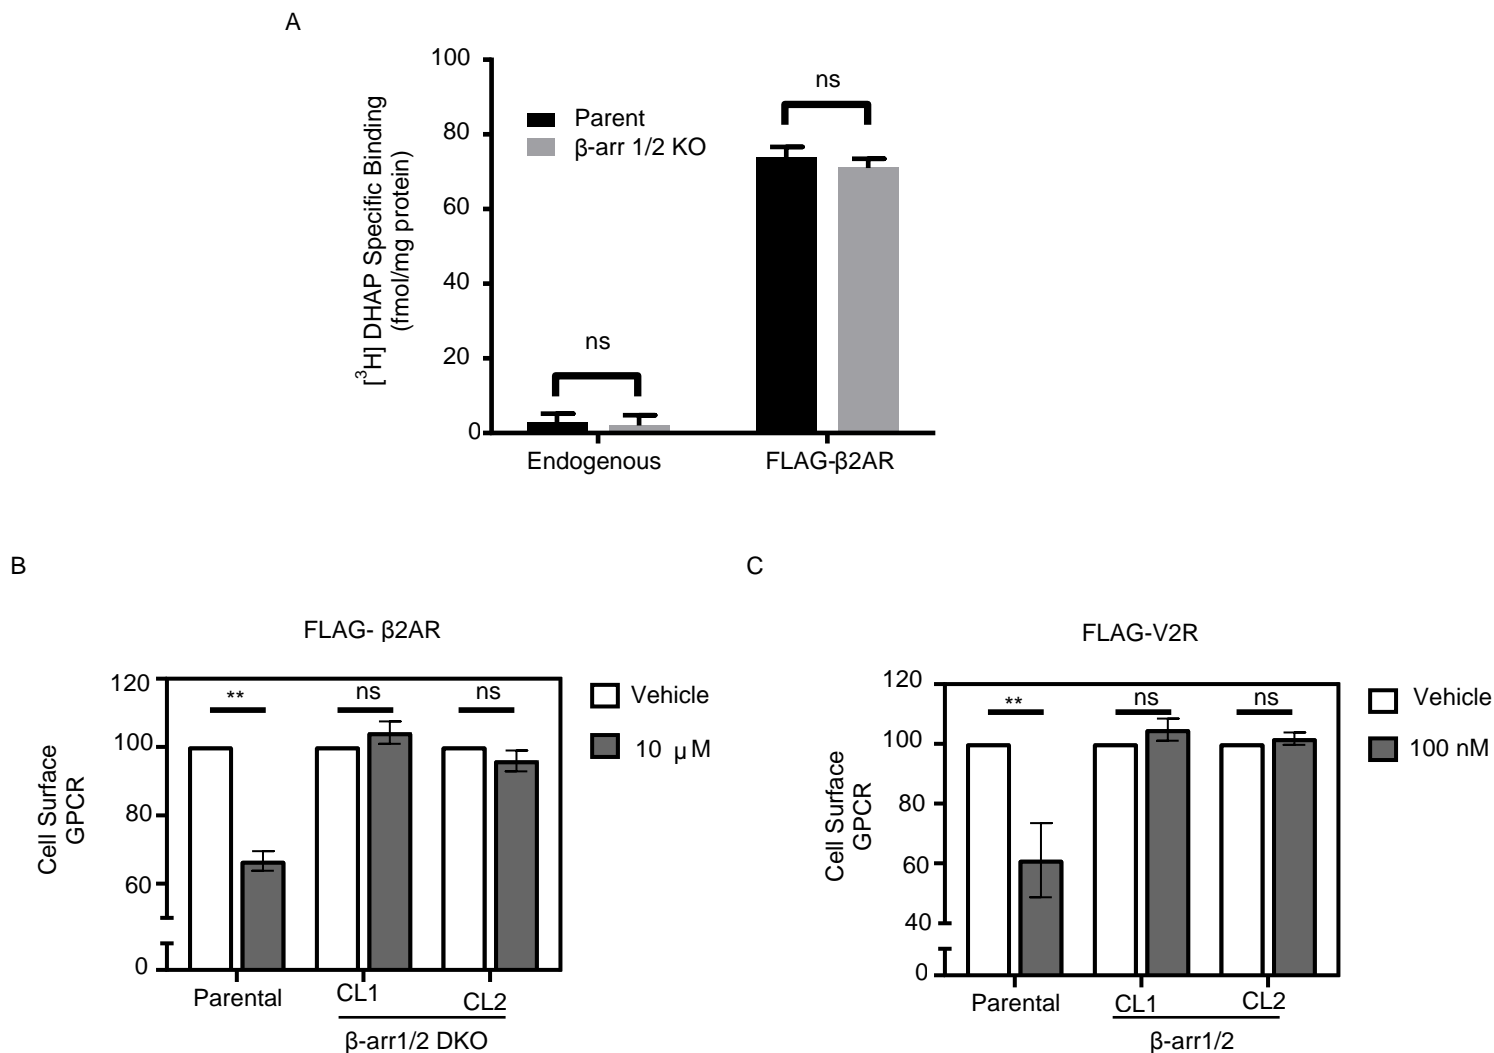

**Fig. S5. Endogenous β<sub>2</sub>AR in parental HEK293 and β-arr 1/2 KO and β<sub>2</sub>AR and V2R internalization in these cells.** A) Expression of β<sub>2</sub>AR, endogenous and transfected, in parental 293 and β-arr 1/2 KO cell lines. Specific binding of [<sup>3</sup>H] dihydroalprenolol ([<sup>3</sup>H] DHAP) at equilibrium in mock transfected parental 293 and β-arr 1/2 KO cells compared with 1 μg FLAG-β<sub>2</sub>AR transfected cells. Results shown are an average of three independent triplicate experiments. Mean and SEM values are plotted. (B and C) Parental HEK293 cells or β-arr1/2-DKO cells (CL1 or CL2) were transfected with a plasmid encoding N-terminally FLAG epitope-tagged β<sub>2</sub>AR (B) or N-terminally FLAG epitope-tagged V2R (C). The cells were treated with or without ligand (Iso, isoproterenol; AVP, arginine vasopressin) for 1 h and GPCR on cell surface was labeled with a primary antibody against the FLAG epitope tag, followed by a secondary antibody conjugated with Alexa 488. Approximately 20,000 cells were analyzed by a flow cytometer. Mean fluorescent intensity (MFI) was used to represent cell surface GPCRs and normalized to that in vehicle-treated condition. Data are mean ± SEM of four to five independent experiments, each performed in biological triplicates. \*\*\*, p < 0.001 based on t-test. ns, not significant.

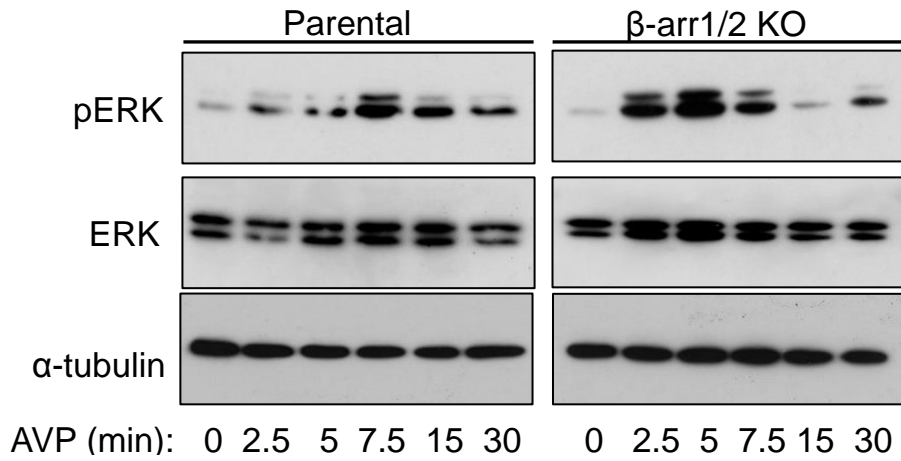

**Fig. S6.  $\beta$ -arrestin is not required for ERK phosphorylation in arginine vasopressin receptor 2 (V2R)-expressing cells.** Time course of vasopressin (100 nM) stimulation in parental 293 and  $\beta$ -arr 1/2 KO cell lines transfected with 4  $\mu$ g HA-V2R. Western blot for ERK phosphorylation (pERK), total ERK, and  $\alpha$ -tubulin. Results represent three independent experiments.

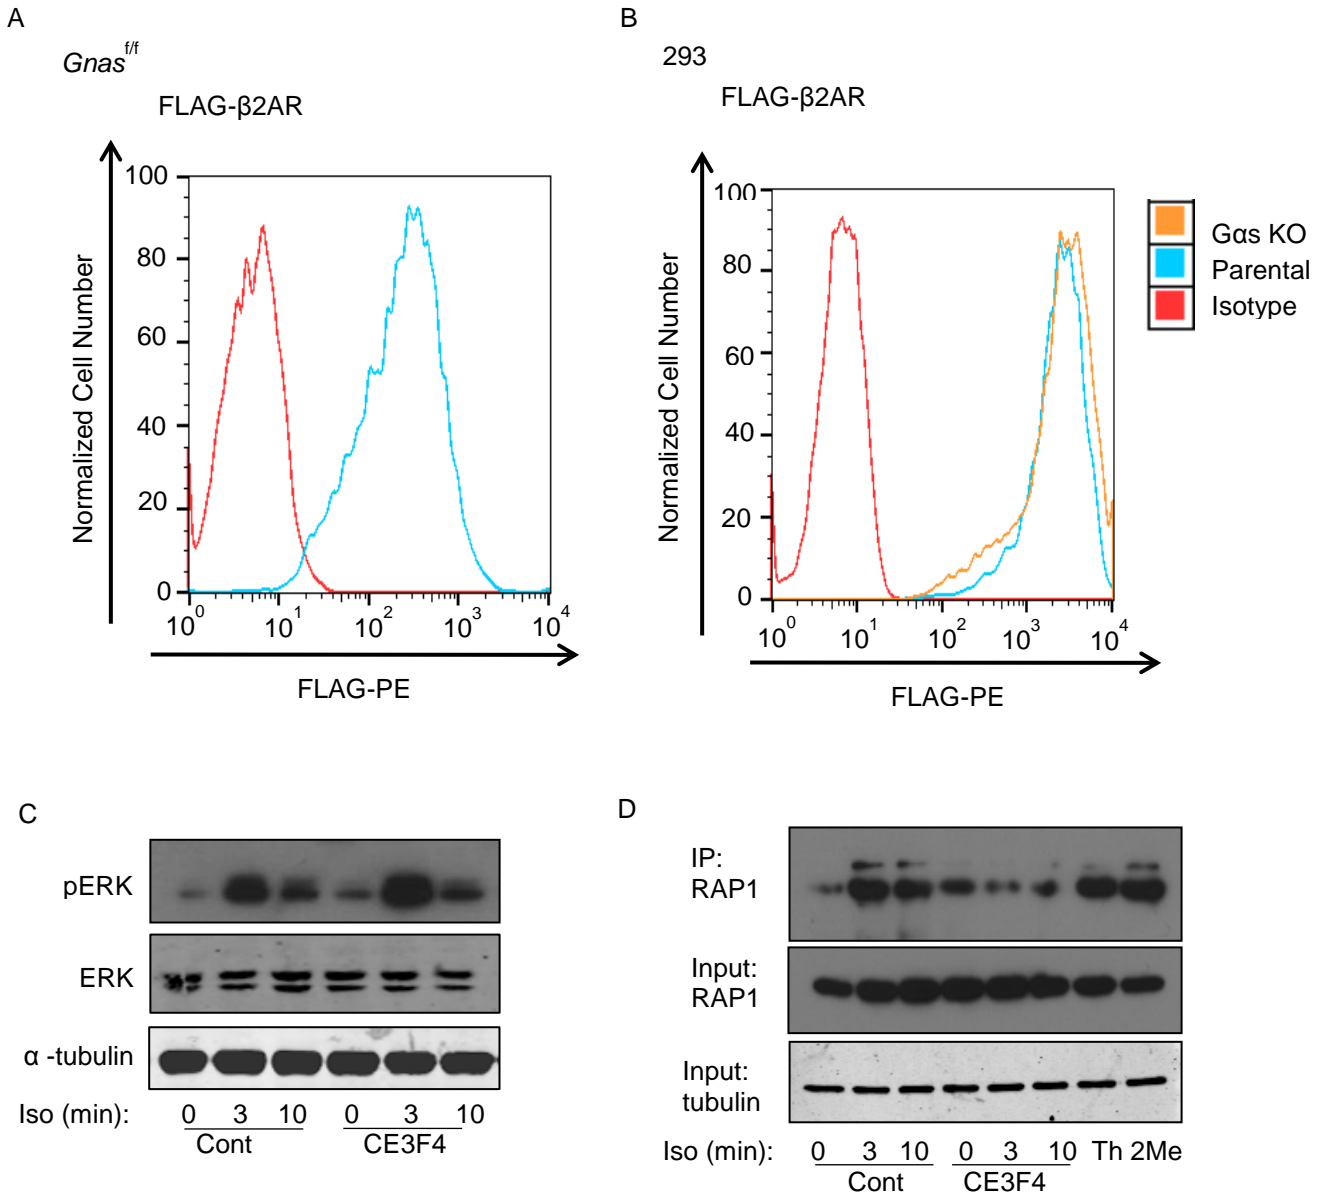

**Fig. S7. Stable expression of FLAG- $\beta_2$ AR on *Gnas* f/f MEFs and  $G\alpha_s$  KO cells and effect of EPAC inhibition on isoproterenol-mediated ERK phosphorylation and RAP1A activation.** A) Flow cytometry analysis of stably-expressed FLAG- $\beta_2$ AR relative to isotype control in *Gnas* f/f MEFs. Representative of three independent experiments. B) Flow cytometry analysis of FLAG- $\beta_2$ AR in  $G\alpha_s$  KO and parental cells relative to isotype control. Representative of three independent experiments. C) Western blot showing the amounts of pERK in 293 FLAG- $\beta_2$ AR cells pretreated with DMSO control or CE3F4 (10  $\mu$ M), unstimulated or stimulated for 3 min or 10 min with Iso (10  $\mu$ M). Representative of three independent experiments. D) Western blot showing active RAP1A pull down (IP) and control input levels of RAP1A and  $\alpha$ -tubulin at 3 min and 10 min Iso stimulations (10  $\mu$ M) following pretreatment with DMSO control (Cont) or the EPAC inhibitor CE3F4 (10  $\mu$ M). Stimulations with the EPAC analog 8-pCPT-2'-O-Me-cAMP (2Me) at 100  $\mu$ M and thrombin (Th) at 0.1 Units/ml were used as positive controls for pull down of active RAP1A. Representative of two independent experiments.

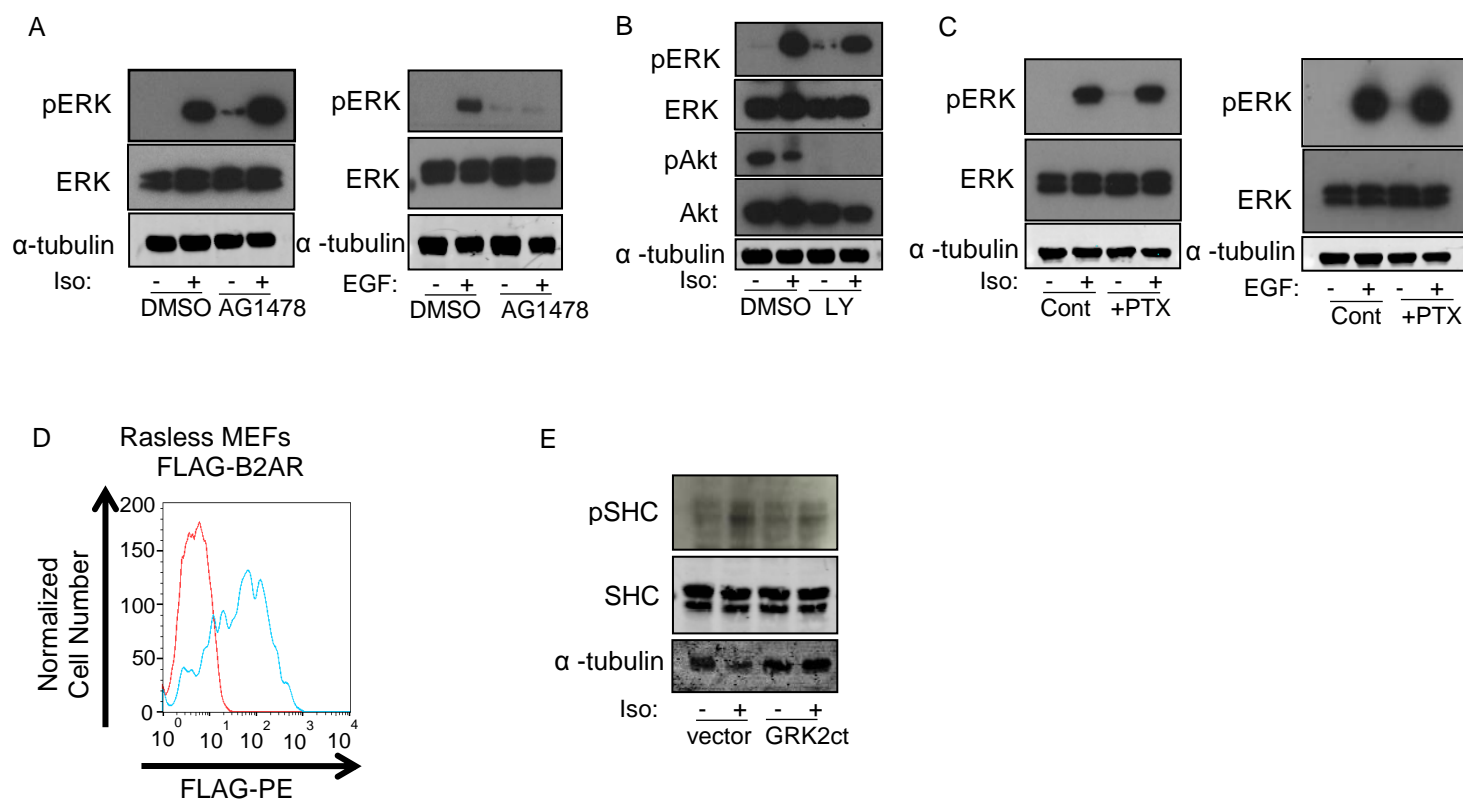

**Fig. S8. EGFR, PI3K, and  $G\alpha_i$  signaling are dispensable for activation of ERK by  $\beta_2AR$ , but  $G\beta\gamma$  signaling is important.** (A) Western blot showing the amounts of pERK and total ERK and  $\alpha$ -tubulin as loading controls in 293 FLAG- $\beta_2AR$  cells pretreated with DMSO control or the EGFR inhibitor AG1478 (10  $\mu$ M), unstimulated (-) or stimulated (+) for 3 min with Iso (10  $\mu$ M, left) or EGF (10 ng/mL, right). Representative of three independent experiments. (B) Western blot showing the amounts of pERK and pAkt (S473) relative to total protein controls and  $\alpha$ -tubulin in 293 FLAG- $\beta_2AR$  cells pretreated with DMSO control or the PI3K inhibitor LY294002 (25  $\mu$ M), unstimulated (-) or stimulated (+) for 3 min with Iso (10  $\mu$ M). Representative of three independent experiments. (C) Western blot showing the amounts of pERK and total ERK and  $\alpha$ -tubulin as loading controls in 293 FLAG- $\beta_2AR$  control cells or cells pretreated with pertussis toxin (PTX) to block  $G_i$  signaling (50 ng/mL), unstimulated (-) or stimulated (+) for 3 min with Iso (10  $\mu$ M, left) or EGF (10 ng/mL, right). Representative of three independent experiments. (D) Flow cytometry profile of stably-expressed FLAG- $\beta_2AR$  relative to isotype control in Rasless MEFs. Representative of three independent experiments. (E) Western blot showing the amounts of pSHC, and total SHC and  $\alpha$ -tubulin as loading controls, in 293 FLAG- $\beta_2AR$  cells transfected with control plasmid or GRK2ct plasmid, unstimulated (-) or stimulated (+) for 3 min with Iso (10  $\mu$ M). Representative of three independent experiments.
